# Supplementary material
Source: Royal Society of Chemistry journal article supplement (doi:10.1039/d6ta03396b)
Supplement: d6ta03396b1.pdf [file d6ta03396b1.pdf]

## **Vacancy Engineering Activates $\pi$ -*d* Conjugated Coordination Polymers for CO<sub>2</sub> Reduction: An Ab Initio Study**

Muhammad Huzaifa<sup>1</sup>, Zaheer UI-Haq<sup>1,\*</sup>, Ahmed Aman<sup>2</sup>, and Mohammad Nur-e-Alam<sup>3</sup>

<sup>1</sup>H.E.J. Research Institute of Chemistry, International Center for Chemical and Biological Sciences, University of Karachi, Karachi, Pakistan

<sup>2</sup> Leslie Dan Faculty of Pharmacy, University of Toronto, Toronto, Ontario, Canada

<sup>3</sup> Department of Pharmacognosy, College of Pharmacy, King Saud University, Riyadh 11451, Kingdom of Saudi Arabia

\* Corresponding author: [zaheer.qasmi@iccs.edu](mailto:zaheer.qasmi@iccs.edu)

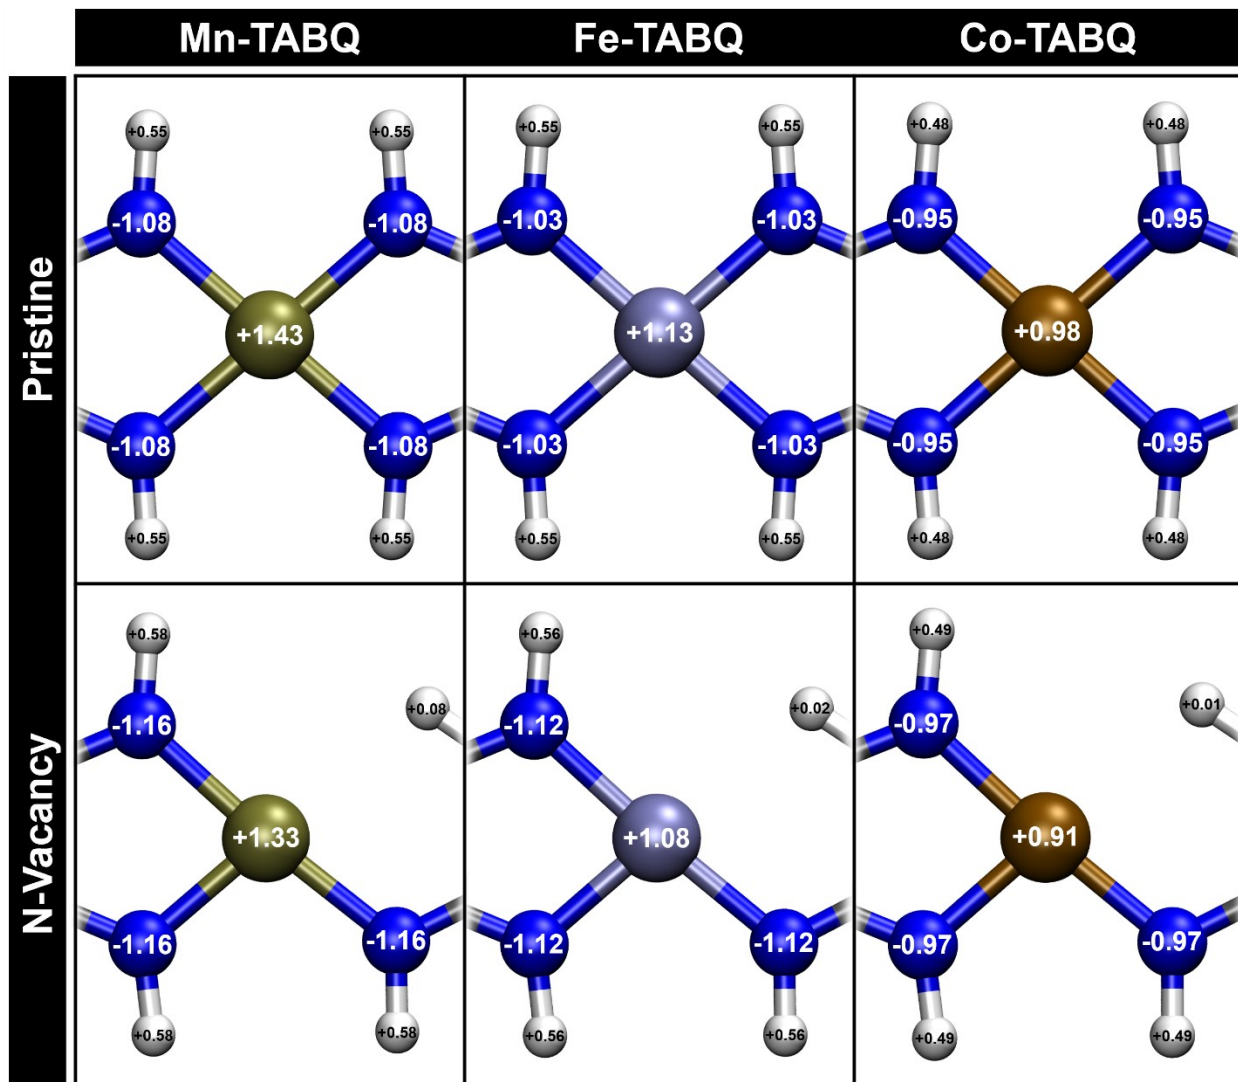

**Figure S1.** Calculated Bader charge distributions for the pristine and nitrogen-vacancy-modified systems.

### Atomic coordinates of Mn-TABQ:

|    |           |          |           |
|----|-----------|----------|-----------|
| H  | 8.416000  | 0.959000 | 10.001000 |
| H  | 3.335000  | 0.949000 | 9.999000  |
| C  | 4.636000  | 2.524000 | 9.999000  |
| C  | 7.107000  | 3.953000 | 10.000000 |
| C  | 4.634000  | 3.948000 | 9.999000  |
| C  | 7.109000  | 2.526000 | 10.000000 |
| C  | 5.876000  | 1.744000 | 9.999000  |
| C  | 5.869000  | 4.732000 | 10.000000 |
| N  | 3.406000  | 1.979000 | 9.999000  |
| N  | 8.337000  | 4.496000 | 10.001000 |
| N  | 3.402000  | 4.491000 | 9.999000  |
| N  | 8.344000  | 1.988000 | 10.001000 |
| O  | 5.875000  | 0.481000 | 9.999000  |
| O  | 5.865000  | 5.995000 | 10.001000 |
| H  | 8.408000  | 5.526000 | 10.001000 |
| H  | 3.332000  | 5.520000 | 9.999000  |
| Mn | 1.957000  | 3.234000 | 9.999000  |
| H  | 16.230000 | 0.948000 | 9.999000  |
| H  | 11.160000 | 0.959000 | 10.001000 |
| C  | 12.461000 | 2.527000 | 10.001000 |
| C  | 14.934000 | 3.951000 | 10.000000 |
| C  | 12.464000 | 3.955000 | 10.001000 |
| C  | 14.931000 | 2.520000 | 10.000000 |
| C  | 13.694000 | 1.741000 | 10.001000 |
| C  | 13.703000 | 4.735000 | 10.000000 |
| N  | 11.229000 | 1.988000 | 10.002000 |
| N  | 16.166000 | 4.489000 | 9.999000  |
| N  | 11.236000 | 4.499000 | 10.001000 |
| N  | 16.160000 | 1.978000 | 9.999000  |
| O  | 13.689000 | 0.478000 | 10.000000 |
| O  | 13.704000 | 5.998000 | 10.000000 |
| H  | 16.236000 | 5.518000 | 9.999000  |
| H  | 11.167000 | 5.529000 | 10.001000 |
| Mn | 9.784000  | 3.244000 | 10.001000 |
| H  | 24.056000 | 0.957000 | 10.000000 |
| H  | 18.988001 | 0.949000 | 9.999000  |
| C  | 20.289000 | 2.520000 | 9.999000  |
| C  | 22.757000 | 3.955000 | 10.001000 |

|    |           |           |           |
|----|-----------|-----------|-----------|
| C  | 20.287001 | 3.952000  | 10.000000 |
| C  | 22.757999 | 2.527000  | 10.001000 |
| C  | 21.524000 | 1.741000  | 10.000000 |
| C  | 21.518000 | 4.735000  | 10.000000 |
| N  | 19.059000 | 1.978000  | 9.999000  |
| N  | 23.986000 | 4.498000  | 10.001000 |
| N  | 19.056000 | 4.490000  | 9.999000  |
| N  | 23.989000 | 1.986000  | 10.001000 |
| O  | 21.531000 | 0.478000  | 9.999000  |
| O  | 21.518999 | 5.999000  | 10.000000 |
| H  | 24.056000 | 5.527000  | 10.001000 |
| H  | 18.986000 | 5.519000  | 9.999000  |
| Mn | 17.611000 | 3.232000  | 9.998000  |
| H  | 31.885000 | 0.949000  | 10.000000 |
| H  | 26.804001 | 0.959000  | 10.002000 |
| C  | 28.110001 | 2.527000  | 10.001000 |
| C  | 30.589001 | 3.950000  | 9.999000  |
| C  | 28.113001 | 3.952000  | 10.001000 |
| C  | 30.586000 | 2.526000  | 10.000000 |
| C  | 29.344000 | 1.746000  | 10.001000 |
| C  | 29.354000 | 4.732000  | 10.000000 |
| N  | 26.875999 | 1.988000  | 10.002000 |
| N  | 31.823000 | 4.492000  | 9.998000  |
| N  | 26.884001 | 4.497000  | 10.002000 |
| N  | 31.815001 | 1.979000  | 9.999000  |
| O  | 29.344000 | 0.485000  | 10.001000 |
| O  | 29.355000 | 5.994000  | 9.999000  |
| H  | 31.893999 | 5.520000  | 9.998000  |
| H  | 26.813999 | 5.527000  | 10.002000 |
| Mn | 25.436001 | 3.243000  | 10.001000 |
| H  | 12.319000 | 7.564000  | 9.999000  |
| H  | 7.252000  | 7.562000  | 10.001000 |
| C  | 8.554000  | 9.128000  | 10.000000 |
| C  | 11.014000 | 10.557000 | 10.000000 |
| C  | 8.554000  | 10.556000 | 10.000000 |
| C  | 11.014000 | 9.129000  | 9.999000  |
| C  | 9.784000  | 8.344000  | 10.000000 |
| C  | 9.784000  | 11.340000 | 10.000000 |
| N  | 7.318000  | 8.590000  | 10.001000 |
| N  | 12.251000 | 11.094000 | 10.000000 |

|    |           |           |           |
|----|-----------|-----------|-----------|
| N  | 7.317000  | 11.093000 | 10.001000 |
| N  | 12.250000 | 8.592000  | 9.999000  |
| O  | 9.784000  | 7.077000  | 10.001000 |
| O  | 9.784000  | 12.608000 | 10.000000 |
| H  | 12.318000 | 12.122000 | 10.000000 |
| H  | 7.250000  | 12.120000 | 10.000000 |
| Mn | 5.876000  | 9.840000  | 10.001000 |
| H  | 20.139000 | 7.555000  | 10.000000 |
| H  | 15.085000 | 7.557000  | 10.001000 |
| C  | 16.375999 | 9.126000  | 10.001000 |
| C  | 18.844999 | 10.557000 | 10.000000 |
| C  | 16.377001 | 10.561000 | 10.000000 |
| C  | 18.844999 | 9.123000  | 10.000000 |
| C  | 17.611000 | 8.343000  | 10.000000 |
| C  | 17.611000 | 11.340000 | 10.001000 |
| N  | 15.149000 | 8.586000  | 10.001000 |
| N  | 20.073000 | 11.097000 | 10.000000 |
| N  | 15.149000 | 11.101000 | 10.000000 |
| N  | 20.073000 | 8.584000  | 10.000000 |
| O  | 17.608999 | 7.078000  | 10.000000 |
| O  | 17.614000 | 12.606000 | 10.001000 |
| H  | 20.136999 | 12.126000 | 10.000000 |
| H  | 15.085000 | 12.130000 | 10.000000 |
| Mn | 13.692000 | 9.844000  | 10.000000 |
| H  | 27.974001 | 7.564000  | 10.000000 |
| H  | 22.902000 | 7.564000  | 10.000000 |
| C  | 24.205999 | 9.129000  | 10.001000 |
| C  | 26.667999 | 10.555000 | 10.000000 |
| C  | 24.205000 | 10.557000 | 10.001000 |
| C  | 26.667999 | 9.128000  | 10.000000 |
| C  | 25.437000 | 8.345000  | 10.000000 |
| C  | 25.436001 | 11.340000 | 10.000000 |
| N  | 22.971001 | 8.592000  | 10.000000 |
| N  | 27.903000 | 11.092000 | 10.000000 |
| N  | 22.968000 | 11.092000 | 10.001000 |
| N  | 27.905001 | 8.592000  | 10.000000 |
| O  | 25.436001 | 7.077000  | 10.000000 |
| O  | 25.438000 | 12.607000 | 9.999000  |
| H  | 27.972000 | 12.120000 | 9.999000  |
| H  | 22.896999 | 12.120000 | 10.001000 |

|    |           |           |           |
|----|-----------|-----------|-----------|
| Mn | 21.528999 | 9.841000  | 10.000000 |
| H  | 35.785000 | 7.554000  | 10.000000 |
| H  | 30.733999 | 7.556000  | 10.000000 |
| C  | 32.028999 | 9.124000  | 9.999000  |
| C  | 34.500000 | 10.560000 | 10.000000 |
| C  | 32.030998 | 10.557000 | 9.999000  |
| C  | 34.498001 | 9.125000  | 10.000000 |
| C  | 33.262001 | 8.344000  | 10.000000 |
| C  | 33.265999 | 11.340000 | 10.000000 |
| N  | 30.799000 | 8.585000  | 10.000000 |
| N  | 35.729000 | 11.098000 | 10.001000 |
| N  | 30.804001 | 11.099000 | 9.999000  |
| N  | 35.723999 | 8.583000  | 10.001000 |
| O  | 33.264000 | 7.078000  | 10.000000 |
| O  | 33.262001 | 12.605000 | 10.000000 |
| H  | 35.794998 | 12.127000 | 10.001000 |
| H  | 30.740999 | 12.128000 | 9.999000  |
| Mn | 29.346001 | 9.842000  | 10.000000 |
| H  | 16.242001 | 14.166000 | 10.001000 |
| H  | 11.161000 | 14.156000 | 9.999000  |
| C  | 12.462000 | 15.731000 | 9.999000  |
| C  | 14.933000 | 17.160000 | 10.000000 |
| C  | 12.460000 | 17.155001 | 9.999000  |
| C  | 14.935000 | 15.733000 | 10.000000 |
| C  | 13.702000 | 14.951000 | 9.999000  |
| C  | 13.695000 | 17.938999 | 10.000000 |
| N  | 11.232000 | 15.186000 | 9.999000  |
| N  | 16.163000 | 17.702999 | 10.001000 |
| N  | 11.228000 | 17.698000 | 9.999000  |
| N  | 16.170000 | 15.195000 | 10.001000 |
| O  | 13.701000 | 13.688000 | 9.999000  |
| O  | 13.691000 | 19.202000 | 10.001000 |
| H  | 16.233999 | 18.733000 | 10.001000 |
| H  | 11.158000 | 18.726999 | 9.999000  |
| Mn | 9.783000  | 16.441000 | 9.999000  |
| H  | 24.056000 | 14.155000 | 9.999000  |
| H  | 18.986000 | 14.166000 | 10.001000 |
| C  | 20.287001 | 15.734000 | 10.001000 |
| C  | 22.760000 | 17.158001 | 10.000000 |
| C  | 20.290001 | 17.162001 | 10.001000 |

|    |           |           |           |
|----|-----------|-----------|-----------|
| C  | 22.757000 | 15.727000 | 10.000000 |
| C  | 21.520000 | 14.948000 | 10.001000 |
| C  | 21.528999 | 17.941999 | 10.000000 |
| N  | 19.055000 | 15.195000 | 10.002000 |
| N  | 23.992001 | 17.695999 | 9.999000  |
| N  | 19.062000 | 17.705999 | 10.001000 |
| N  | 23.986000 | 15.185000 | 9.999000  |
| O  | 21.514999 | 13.685000 | 10.000000 |
| O  | 21.530001 | 19.205000 | 10.000000 |
| H  | 24.062000 | 18.725000 | 9.999000  |
| H  | 18.993000 | 18.736000 | 10.001000 |
| Mn | 17.610001 | 16.451000 | 10.001000 |
| H  | 31.882000 | 14.164000 | 10.000000 |
| H  | 26.813999 | 14.156000 | 9.999000  |
| C  | 28.115000 | 15.727000 | 9.999000  |
| C  | 30.583000 | 17.162001 | 10.001000 |
| C  | 28.113001 | 17.159000 | 10.000000 |
| C  | 30.584000 | 15.734000 | 10.001000 |
| C  | 29.350000 | 14.948000 | 10.000000 |
| C  | 29.344000 | 17.941999 | 10.000000 |
| N  | 26.885000 | 15.185000 | 9.999000  |
| N  | 31.812000 | 17.705000 | 10.001000 |
| N  | 26.882000 | 17.697001 | 9.999000  |
| N  | 31.815001 | 15.193000 | 10.001000 |
| O  | 29.357000 | 13.685000 | 9.999000  |
| O  | 29.344999 | 19.205999 | 10.000000 |
| H  | 31.882000 | 18.733999 | 10.001000 |
| H  | 26.812000 | 18.726000 | 9.999000  |
| Mn | 25.437000 | 16.438999 | 9.998000  |
| H  | 39.710999 | 14.156000 | 10.000000 |
| H  | 34.630001 | 14.166000 | 10.002000 |
| C  | 35.936001 | 15.734000 | 10.001000 |
| C  | 38.415001 | 17.157000 | 9.999000  |
| C  | 35.938999 | 17.159000 | 10.001000 |
| C  | 38.411999 | 15.733000 | 10.000000 |
| C  | 37.169998 | 14.953000 | 10.001000 |
| C  | 37.180000 | 17.938999 | 10.000000 |
| N  | 34.702000 | 15.195000 | 10.002000 |
| N  | 39.648998 | 17.698999 | 9.998000  |
| N  | 34.709999 | 17.704000 | 10.002000 |

|    |           |           |           |
|----|-----------|-----------|-----------|
| N  | 39.640999 | 15.186000 | 9.999000  |
| O  | 37.169998 | 13.692000 | 10.001000 |
| O  | 37.181000 | 19.201000 | 9.999000  |
| H  | 39.720001 | 18.726999 | 9.998000  |
| H  | 34.639999 | 18.733999 | 10.002000 |
| Mn | 33.262001 | 16.450001 | 10.001000 |
| H  | 20.145000 | 20.771000 | 9.999000  |
| H  | 15.078000 | 20.768999 | 10.001000 |
| C  | 16.379999 | 22.334999 | 10.000000 |
| C  | 18.840000 | 23.764000 | 10.000000 |
| C  | 16.379999 | 23.763000 | 10.000000 |
| C  | 18.840000 | 22.336000 | 9.999000  |
| C  | 17.610001 | 21.551001 | 10.000000 |
| C  | 17.610001 | 24.547001 | 10.000000 |
| N  | 15.144000 | 21.797001 | 10.001000 |
| N  | 20.077000 | 24.301001 | 10.000000 |
| N  | 15.143000 | 24.299999 | 10.001000 |
| N  | 20.076000 | 21.799000 | 9.999000  |
| O  | 17.610001 | 20.284000 | 10.001000 |
| O  | 17.610001 | 25.815001 | 10.000000 |
| H  | 20.143999 | 25.329000 | 10.000000 |
| H  | 15.076000 | 25.327000 | 10.000000 |
| Mn | 13.702000 | 23.047001 | 10.001000 |
| H  | 27.965000 | 20.761999 | 10.000000 |
| H  | 22.910999 | 20.764000 | 10.001000 |
| C  | 24.202000 | 22.333000 | 10.001000 |
| C  | 26.671000 | 23.764000 | 10.000000 |
| C  | 24.202999 | 23.768000 | 10.000000 |
| C  | 26.671000 | 22.330000 | 10.000000 |
| C  | 25.437000 | 21.549999 | 10.000000 |
| C  | 25.437000 | 24.547001 | 10.001000 |
| N  | 22.975000 | 21.792999 | 10.001000 |
| N  | 27.899000 | 24.304001 | 10.000000 |
| N  | 22.975000 | 24.308001 | 10.000000 |
| N  | 27.899000 | 21.791000 | 10.000000 |
| O  | 25.434999 | 20.285000 | 10.000000 |
| O  | 25.440001 | 25.813000 | 10.001000 |
| H  | 27.962999 | 25.333000 | 10.000000 |
| H  | 22.910999 | 25.337000 | 10.000000 |
| Mn | 21.518000 | 23.051001 | 10.000000 |

|    |           |           |           |
|----|-----------|-----------|-----------|
| H  | 35.799999 | 20.771000 | 10.000000 |
| H  | 30.728001 | 20.771000 | 10.000000 |
| C  | 32.032001 | 22.336000 | 10.001000 |
| C  | 34.493999 | 23.761999 | 10.000000 |
| C  | 32.030998 | 23.764000 | 10.001000 |
| C  | 34.493999 | 22.334999 | 10.000000 |
| C  | 33.263000 | 21.552000 | 10.000000 |
| C  | 33.262001 | 24.547001 | 10.000000 |
| N  | 30.797001 | 21.799000 | 10.000000 |
| N  | 35.729000 | 24.299000 | 10.000000 |
| N  | 30.794001 | 24.299000 | 10.001000 |
| N  | 35.730999 | 21.799000 | 10.000000 |
| O  | 33.262001 | 20.284000 | 10.000000 |
| O  | 33.264000 | 25.813999 | 9.999000  |
| H  | 35.798000 | 25.327000 | 9.999000  |
| H  | 30.723000 | 25.327000 | 10.001000 |
| Mn | 29.355000 | 23.048000 | 10.000000 |
| H  | 43.611000 | 20.761000 | 10.000000 |
| H  | 38.560001 | 20.763000 | 10.000000 |
| C  | 39.855000 | 22.330999 | 9.999000  |
| C  | 42.326000 | 23.767000 | 10.000000 |
| C  | 39.856998 | 23.764000 | 9.999000  |
| C  | 42.324001 | 22.332001 | 10.000000 |
| C  | 41.088001 | 21.551001 | 10.000000 |
| C  | 41.091999 | 24.547001 | 10.000000 |
| N  | 38.625000 | 21.792000 | 10.000000 |
| N  | 43.555000 | 24.305000 | 10.001000 |
| N  | 38.630001 | 24.306000 | 9.999000  |
| N  | 43.549999 | 21.790001 | 10.001000 |
| O  | 41.090000 | 20.285000 | 10.000000 |
| O  | 41.088001 | 25.812000 | 10.000000 |
| H  | 43.620998 | 25.334000 | 10.001000 |
| H  | 38.567001 | 25.334999 | 9.999000  |
| Mn | 37.172001 | 23.049000 | 10.000000 |

### Atomic coordinates of Fe-TABQ:

|   |          |          |           |
|---|----------|----------|-----------|
| H | 8.340000 | 0.975000 | 10.000000 |
| H | 3.284000 | 0.980000 | 10.000000 |
| C | 4.579000 | 2.527000 | 10.001000 |

|    |           |          |           |
|----|-----------|----------|-----------|
| C  | 7.041000  | 3.969000 | 10.001000 |
| C  | 4.578000  | 3.978000 | 10.000000 |
| C  | 7.040000  | 2.528000 | 10.001000 |
| C  | 5.804000  | 1.742000 | 10.001000 |
| C  | 5.807000  | 4.759000 | 10.000000 |
| N  | 3.349000  | 2.010000 | 10.000000 |
| N  | 8.267000  | 4.491000 | 10.001000 |
| N  | 3.350000  | 4.496000 | 9.999000  |
| N  | 8.267000  | 2.006000 | 10.000000 |
| O  | 5.813000  | 0.478000 | 10.001000 |
| O  | 5.821000  | 6.022000 | 10.000000 |
| H  | 8.338000  | 5.522000 | 10.001000 |
| H  | 3.281000  | 5.527000 | 9.999000  |
| Fe | 1.935000  | 3.253000 | 10.000000 |
| H  | 16.094999 | 0.984000 | 10.002000 |
| H  | 11.034000 | 0.981000 | 9.999000  |
| C  | 12.343000 | 2.531000 | 10.000000 |
| C  | 14.797000 | 3.979000 | 10.000000 |
| C  | 12.343000 | 3.969000 | 10.000000 |
| C  | 14.797000 | 2.529000 | 10.000000 |
| C  | 13.575000 | 1.742000 | 10.000000 |
| C  | 13.573000 | 4.762000 | 10.000000 |
| N  | 11.111000 | 2.012000 | 9.999000  |
| N  | 16.031000 | 4.493000 | 10.000000 |
| N  | 11.111000 | 4.487000 | 10.000000 |
| N  | 16.030001 | 2.015000 | 10.001000 |
| O  | 13.566000 | 0.477000 | 9.999000  |
| O  | 13.558000 | 6.029000 | 10.000000 |
| H  | 16.101999 | 5.523000 | 10.001000 |
| H  | 11.037000 | 5.517000 | 10.000000 |
| Fe | 9.695000  | 3.249000 | 9.999000  |
| H  | 23.841000 | 0.975000 | 10.000000 |
| H  | 18.785999 | 0.980000 | 10.002000 |
| C  | 20.080000 | 2.527000 | 10.000000 |
| C  | 22.542999 | 3.969000 | 10.001000 |
| C  | 20.080000 | 3.978000 | 10.000000 |
| C  | 22.542000 | 2.528000 | 10.000000 |
| C  | 21.305000 | 1.742000 | 9.999000  |
| C  | 21.309000 | 4.759000 | 10.000000 |
| N  | 18.851000 | 2.010000 | 10.001000 |

|    |           |           |           |
|----|-----------|-----------|-----------|
| N  | 23.768999 | 4.491000  | 10.001000 |
| N  | 18.851999 | 4.496000  | 10.001000 |
| N  | 23.768000 | 2.006000  | 10.000000 |
| O  | 21.313999 | 0.478000  | 9.999000  |
| O  | 21.323000 | 6.022000  | 9.999000  |
| H  | 23.839001 | 5.522000  | 10.002000 |
| H  | 18.784000 | 5.527000  | 10.003000 |
| Fe | 17.437000 | 3.253000  | 10.001000 |
| H  | 31.597000 | 0.984000  | 10.002000 |
| H  | 26.535999 | 0.981000  | 9.998000  |
| C  | 27.844000 | 2.531000  | 10.000000 |
| C  | 30.298000 | 3.979000  | 10.000000 |
| C  | 27.844000 | 3.970000  | 10.000000 |
| C  | 30.298000 | 2.529000  | 10.001000 |
| C  | 29.076000 | 1.742000  | 10.000000 |
| C  | 29.073999 | 4.762000  | 10.000000 |
| N  | 26.612000 | 2.012000  | 9.999000  |
| N  | 31.532000 | 4.493000  | 9.999000  |
| N  | 26.612000 | 4.487000  | 10.001000 |
| N  | 31.531000 | 2.015000  | 10.001000 |
| O  | 29.066999 | 0.477000  | 10.000000 |
| O  | 29.059999 | 6.029000  | 10.000000 |
| H  | 31.603001 | 5.523000  | 9.998000  |
| H  | 26.538000 | 5.517000  | 10.001000 |
| Fe | 25.195999 | 3.249000  | 10.000000 |
| H  | 12.217000 | 7.605000  | 9.998000  |
| H  | 7.158000  | 7.608000  | 9.999000  |
| C  | 8.454000  | 9.155000  | 9.999000  |
| C  | 10.916000 | 10.598000 | 10.000000 |
| C  | 8.454000  | 10.606000 | 9.999000  |
| C  | 10.916000 | 9.158000  | 10.000000 |
| C  | 9.680000  | 8.371000  | 10.000000 |
| C  | 9.681000  | 11.388000 | 10.000000 |
| N  | 7.225000  | 8.638000  | 9.999000  |
| N  | 12.142000 | 11.121000 | 9.999000  |
| N  | 7.226000  | 11.124000 | 10.000000 |
| N  | 12.142000 | 8.636000  | 9.999000  |
| O  | 9.691000  | 7.107000  | 10.001000 |
| O  | 9.696000  | 12.651000 | 10.001000 |
| H  | 12.211000 | 12.152000 | 9.998000  |

|    |           |           |           |
|----|-----------|-----------|-----------|
| H  | 7.158000  | 12.155000 | 10.000000 |
| Fe | 5.811000  | 9.881000  | 10.000000 |
| H  | 19.969000 | 7.613000  | 10.000000 |
| H  | 14.908000 | 7.613000  | 10.001000 |
| C  | 16.216999 | 9.162000  | 10.001000 |
| C  | 18.672001 | 10.609000 | 10.001000 |
| C  | 16.216999 | 10.600000 | 10.000000 |
| C  | 18.671000 | 9.159000  | 10.001000 |
| C  | 17.448000 | 8.373000  | 10.001000 |
| C  | 17.447001 | 11.392000 | 10.001000 |
| N  | 14.985000 | 8.643000  | 10.001000 |
| N  | 19.906000 | 11.122000 | 10.001000 |
| N  | 14.985000 | 11.118000 | 9.999000  |
| N  | 19.903999 | 8.643000  | 10.001000 |
| O  | 17.438000 | 7.108000  | 10.002000 |
| O  | 17.431999 | 12.659000 | 10.001000 |
| H  | 19.976000 | 12.152000 | 10.001000 |
| H  | 14.911000 | 12.148000 | 9.997000  |
| Fe | 13.569000 | 9.880000  | 9.999000  |
| H  | 27.719000 | 7.605000  | 9.996000  |
| H  | 22.660000 | 7.608000  | 9.999000  |
| C  | 23.955999 | 9.154000  | 10.001000 |
| C  | 26.417999 | 10.598000 | 10.000000 |
| C  | 23.955999 | 10.606000 | 10.000000 |
| C  | 26.417999 | 9.157000  | 10.000000 |
| C  | 25.181999 | 8.370000  | 10.001000 |
| C  | 25.183001 | 11.388000 | 10.001000 |
| N  | 22.726999 | 8.638000  | 10.000000 |
| N  | 27.643999 | 11.121000 | 9.999000  |
| N  | 22.728001 | 11.124000 | 10.000000 |
| N  | 27.643999 | 8.636000  | 9.997000  |
| O  | 25.193001 | 7.106000  | 10.003000 |
| O  | 25.198000 | 12.651000 | 10.002000 |
| H  | 27.714001 | 12.151000 | 9.998000  |
| H  | 22.660000 | 12.155000 | 9.999000  |
| Fe | 21.312000 | 9.881000  | 10.001000 |
| H  | 35.471001 | 7.613000  | 10.000000 |
| H  | 30.410000 | 7.612000  | 9.999000  |
| C  | 31.719000 | 9.162000  | 10.001000 |
| C  | 34.174000 | 10.608000 | 10.001000 |

|    |           |           |           |
|----|-----------|-----------|-----------|
| C  | 31.719000 | 10.600000 | 10.001000 |
| C  | 34.173000 | 9.159000  | 10.001000 |
| C  | 32.950001 | 8.373000  | 10.001000 |
| C  | 32.949001 | 11.392000 | 10.001000 |
| N  | 30.487000 | 8.643000  | 10.000000 |
| N  | 35.407001 | 11.122000 | 10.001000 |
| N  | 30.487000 | 11.118000 | 9.999000  |
| N  | 35.405998 | 8.643000  | 10.000000 |
| O  | 32.939999 | 7.107000  | 10.001000 |
| O  | 32.933998 | 12.659000 | 10.002000 |
| H  | 35.478001 | 12.152000 | 10.001000 |
| H  | 30.413000 | 12.148000 | 9.997000  |
| Fe | 29.070999 | 9.879000  | 9.998000  |
| H  | 16.091000 | 14.238000 | 10.000000 |
| H  | 11.035000 | 14.243000 | 10.000000 |
| C  | 12.330000 | 15.790000 | 10.001000 |
| C  | 14.792000 | 17.232000 | 10.001000 |
| C  | 12.329000 | 17.240999 | 10.000000 |
| C  | 14.791000 | 15.791000 | 10.001000 |
| C  | 13.555000 | 15.005000 | 10.001000 |
| C  | 13.558000 | 18.021999 | 10.000000 |
| N  | 11.100000 | 15.273000 | 10.000000 |
| N  | 16.018000 | 17.754000 | 10.001000 |
| N  | 11.101000 | 17.759001 | 9.999000  |
| N  | 16.018000 | 15.269000 | 10.000000 |
| O  | 13.564000 | 13.741000 | 10.001000 |
| O  | 13.572000 | 19.285000 | 10.000000 |
| H  | 16.089001 | 18.785000 | 10.001000 |
| H  | 11.032000 | 18.790001 | 9.999000  |
| Fe | 9.686000  | 16.516001 | 10.000000 |
| H  | 23.846001 | 14.247000 | 10.002000 |
| H  | 18.785000 | 14.244000 | 9.999000  |
| C  | 20.094000 | 15.794000 | 10.000000 |
| C  | 22.548000 | 17.242001 | 10.000000 |
| C  | 20.094000 | 17.232000 | 10.000000 |
| C  | 22.548000 | 15.792000 | 10.000000 |
| C  | 21.326000 | 15.005000 | 10.000000 |
| C  | 21.323999 | 18.025000 | 10.000000 |
| N  | 18.862000 | 15.275000 | 9.999000  |
| N  | 23.782000 | 17.756001 | 10.000000 |

|    |           |           |           |
|----|-----------|-----------|-----------|
| N  | 18.862000 | 17.750000 | 10.000000 |
| N  | 23.781000 | 15.278000 | 10.001000 |
| O  | 21.316999 | 13.740000 | 9.999000  |
| O  | 21.309000 | 19.292000 | 10.000000 |
| H  | 23.853001 | 18.785999 | 10.001000 |
| H  | 18.788000 | 18.780001 | 10.000000 |
| Fe | 17.445999 | 16.511999 | 9.999000  |
| H  | 31.591999 | 14.238000 | 10.000000 |
| H  | 26.537001 | 14.243000 | 10.002000 |
| C  | 27.830999 | 15.790000 | 10.000000 |
| C  | 30.294001 | 17.232000 | 10.001000 |
| C  | 27.830999 | 17.240999 | 10.000000 |
| C  | 30.292999 | 15.791000 | 10.000000 |
| C  | 29.056000 | 15.005000 | 9.999000  |
| C  | 29.059999 | 18.021999 | 10.000000 |
| N  | 26.601999 | 15.273000 | 10.001000 |
| N  | 31.520000 | 17.754000 | 10.001000 |
| N  | 26.603001 | 17.759001 | 10.001000 |
| N  | 31.518999 | 15.269000 | 10.000000 |
| O  | 29.065001 | 13.741000 | 9.999000  |
| O  | 29.073999 | 19.285000 | 9.999000  |
| H  | 31.590000 | 18.785000 | 10.002000 |
| H  | 26.535000 | 18.790001 | 10.003000 |
| Fe | 25.188000 | 16.516001 | 10.001000 |
| H  | 39.348000 | 14.247000 | 10.002000 |
| H  | 34.286999 | 14.244000 | 9.998000  |
| C  | 35.595001 | 15.794000 | 10.000000 |
| C  | 38.049000 | 17.242001 | 10.000000 |
| C  | 35.595001 | 17.233000 | 10.000000 |
| C  | 38.049000 | 15.792000 | 10.001000 |
| C  | 36.827000 | 15.005000 | 10.000000 |
| C  | 36.825001 | 18.025000 | 10.000000 |
| N  | 34.362999 | 15.275000 | 9.999000  |
| N  | 39.283001 | 17.756001 | 9.999000  |
| N  | 34.362999 | 17.750000 | 10.001000 |
| N  | 39.282001 | 15.278000 | 10.001000 |
| O  | 36.818001 | 13.740000 | 10.000000 |
| O  | 36.811001 | 19.292000 | 10.000000 |
| H  | 39.354000 | 18.785999 | 9.998000  |
| H  | 34.289001 | 18.780001 | 10.001000 |

|    |           |           |           |
|----|-----------|-----------|-----------|
| Fe | 32.946999 | 16.511999 | 10.000000 |
| H  | 19.968000 | 20.868000 | 9.998000  |
| H  | 14.909000 | 20.871000 | 9.999000  |
| C  | 16.205000 | 22.417999 | 9.999000  |
| C  | 18.667000 | 23.861000 | 10.000000 |
| C  | 16.205000 | 23.868999 | 9.999000  |
| C  | 18.667000 | 22.421000 | 10.000000 |
| C  | 17.431000 | 21.634001 | 10.000000 |
| C  | 17.431999 | 24.650999 | 10.000000 |
| N  | 14.976000 | 21.900999 | 9.999000  |
| N  | 19.893000 | 24.384001 | 9.999000  |
| N  | 14.977000 | 24.386999 | 10.000000 |
| N  | 19.893000 | 21.899000 | 9.999000  |
| O  | 17.441999 | 20.370001 | 10.001000 |
| O  | 17.447001 | 25.914000 | 10.001000 |
| H  | 19.962000 | 25.415001 | 9.998000  |
| H  | 14.909000 | 25.417999 | 10.000000 |
| Fe | 13.562000 | 23.143999 | 10.000000 |
| H  | 27.719999 | 20.875999 | 10.000000 |
| H  | 22.659000 | 20.875999 | 10.001000 |
| C  | 23.968000 | 22.424999 | 10.001000 |
| C  | 26.423000 | 23.872000 | 10.001000 |
| C  | 23.968000 | 23.863001 | 10.000000 |
| C  | 26.422001 | 22.422001 | 10.001000 |
| C  | 25.198999 | 21.636000 | 10.001000 |
| C  | 25.198000 | 24.655001 | 10.001000 |
| N  | 22.736000 | 21.906000 | 10.001000 |
| N  | 27.657000 | 24.385000 | 10.001000 |
| N  | 22.736000 | 24.381001 | 9.999000  |
| N  | 27.655001 | 21.906000 | 10.001000 |
| O  | 25.188999 | 20.371000 | 10.002000 |
| O  | 25.183001 | 25.922001 | 10.001000 |
| H  | 27.726999 | 25.415001 | 10.001000 |
| H  | 22.662001 | 25.410999 | 9.997000  |
| Fe | 21.320000 | 23.143000 | 9.999000  |
| H  | 35.470001 | 20.868000 | 9.996000  |
| H  | 30.410999 | 20.871000 | 9.999000  |
| C  | 31.707001 | 22.417000 | 10.001000 |
| C  | 34.168999 | 23.861000 | 10.000000 |
| C  | 31.707001 | 23.868999 | 10.000000 |

|    |           |           |           |
|----|-----------|-----------|-----------|
| C  | 34.168999 | 22.420000 | 10.000000 |
| C  | 32.932999 | 21.632999 | 10.001000 |
| C  | 32.933998 | 24.650999 | 10.001000 |
| N  | 30.478001 | 21.900999 | 10.000000 |
| N  | 35.395000 | 24.384001 | 9.999000  |
| N  | 30.479000 | 24.386999 | 10.000000 |
| N  | 35.395000 | 21.899000 | 9.997000  |
| O  | 32.944000 | 20.368999 | 10.003000 |
| O  | 32.949001 | 25.914000 | 10.002000 |
| H  | 35.465000 | 25.414000 | 9.998000  |
| H  | 30.410999 | 25.417999 | 9.999000  |
| Fe | 29.063000 | 23.143999 | 10.001000 |
| H  | 43.222000 | 20.875999 | 10.000000 |
| H  | 38.160999 | 20.875000 | 9.999000  |
| C  | 39.470001 | 22.424999 | 10.001000 |
| C  | 41.924999 | 23.871000 | 10.001000 |
| C  | 39.470001 | 23.863001 | 10.001000 |
| C  | 41.924000 | 22.422001 | 10.001000 |
| C  | 40.701000 | 21.636000 | 10.001000 |
| C  | 40.700001 | 24.655001 | 10.001000 |
| N  | 38.237999 | 21.906000 | 10.000000 |
| N  | 43.158001 | 24.385000 | 10.001000 |
| N  | 38.237999 | 24.381001 | 9.999000  |
| N  | 43.157001 | 21.906000 | 10.000000 |
| O  | 40.691002 | 20.370001 | 10.001000 |
| O  | 40.685001 | 25.922001 | 10.002000 |
| H  | 43.229000 | 25.415001 | 10.001000 |
| H  | 38.164001 | 25.410999 | 9.997000  |
| Fe | 36.821999 | 23.142000 | 9.998000  |

**Atomic coordinates of Co-TABQ:**

|   |          |          |           |
|---|----------|----------|-----------|
| H | 8.295000 | 0.988000 | 10.000000 |
| H | 3.211000 | 0.985000 | 10.001000 |
| C | 4.526000 | 2.525000 | 10.001000 |
| C | 6.988000 | 3.971000 | 9.999000  |
| C | 4.527000 | 3.967000 | 10.001000 |
| C | 6.987000 | 2.529000 | 10.000000 |
| C | 5.757000 | 1.739000 | 10.000000 |
| C | 5.757000 | 4.757000 | 10.000000 |

|    |           |          |           |
|----|-----------|----------|-----------|
| N  | 3.296000  | 2.015000 | 10.001000 |
| N  | 8.219000  | 4.480000 | 9.999000  |
| N  | 3.297000  | 4.479000 | 10.002000 |
| N  | 8.217000  | 2.017000 | 9.999000  |
| O  | 5.760000  | 0.477000 | 10.000000 |
| O  | 5.754000  | 6.019000 | 9.999000  |
| H  | 8.304000  | 5.510000 | 9.999000  |
| H  | 3.217000  | 5.508000 | 10.002000 |
| Co | 1.917000  | 3.246000 | 10.002000 |
| H  | 15.974000 | 0.990000 | 10.001000 |
| H  | 10.887000 | 0.993000 | 9.998000  |
| C  | 12.203000 | 2.529000 | 10.000000 |
| C  | 14.651000 | 3.968000 | 10.000000 |
| C  | 12.203000 | 3.972000 | 10.001000 |
| C  | 14.651000 | 2.525000 | 10.001000 |
| C  | 13.426000 | 1.735000 | 10.000000 |
| C  | 13.428000 | 4.762000 | 10.000000 |
| N  | 10.969000 | 2.022000 | 9.999000  |
| N  | 15.886000 | 4.474000 | 10.000000 |
| N  | 10.967000 | 4.477000 | 10.001000 |
| N  | 15.887000 | 2.019000 | 10.000000 |
| O  | 13.423000 | 0.470000 | 10.000000 |
| O  | 13.431000 | 6.027000 | 10.001000 |
| H  | 15.968000 | 5.503000 | 9.999000  |
| H  | 10.879000 | 5.507000 | 10.001000 |
| Co | 9.598000  | 3.248000 | 10.000000 |
| H  | 23.636999 | 0.988000 | 9.999000  |
| H  | 18.551001 | 0.986000 | 9.999000  |
| C  | 19.867001 | 2.526000 | 9.999000  |
| C  | 22.329000 | 3.971000 | 10.001000 |
| C  | 19.868000 | 3.968000 | 9.999000  |
| C  | 22.327999 | 2.529000 | 10.000000 |
| C  | 21.098000 | 1.739000 | 10.000000 |
| C  | 21.098000 | 4.758000 | 10.000000 |
| N  | 18.636000 | 2.016000 | 9.999000  |
| N  | 23.561001 | 4.480000 | 10.001000 |
| N  | 18.638000 | 4.479000 | 9.999000  |
| N  | 23.558001 | 2.017000 | 10.000000 |
| O  | 21.101000 | 0.478000 | 10.000000 |
| O  | 21.094999 | 6.019000 | 10.000000 |

|    |           |           |           |
|----|-----------|-----------|-----------|
| H  | 23.646000 | 5.510000  | 10.002000 |
| H  | 18.556999 | 5.508000  | 9.999000  |
| Co | 17.257000 | 3.247000  | 10.000000 |
| H  | 31.316000 | 0.989000  | 10.001000 |
| H  | 26.229000 | 0.993000  | 10.001000 |
| C  | 27.545000 | 2.528000  | 10.000000 |
| C  | 29.993000 | 3.968000  | 10.001000 |
| C  | 27.545000 | 3.972000  | 10.000000 |
| C  | 29.993000 | 2.524000  | 10.001000 |
| C  | 28.768000 | 1.734000  | 10.000000 |
| C  | 28.770000 | 4.762000  | 10.000000 |
| N  | 26.311001 | 2.022000  | 10.000000 |
| N  | 31.228001 | 4.474000  | 10.002000 |
| N  | 26.309000 | 4.477000  | 10.001000 |
| N  | 31.229000 | 2.019000  | 10.001000 |
| O  | 28.764999 | 0.469000  | 10.000000 |
| O  | 28.774000 | 6.027000  | 10.000000 |
| H  | 31.309999 | 5.503000  | 10.002000 |
| H  | 26.222000 | 5.507000  | 10.000000 |
| Co | 24.938999 | 3.248000  | 10.001000 |
| H  | 12.145000 | 7.619000  | 10.002000 |
| H  | 7.058000  | 7.623000  | 9.997000  |
| C  | 8.374000  | 9.158000  | 9.998000  |
| C  | 10.822000 | 10.598000 | 10.001000 |
| C  | 8.374000  | 10.602000 | 9.999000  |
| C  | 10.822000 | 9.155000  | 10.001000 |
| C  | 9.597000  | 8.365000  | 10.000000 |
| C  | 9.599000  | 11.392000 | 10.000000 |
| N  | 7.139000  | 8.652000  | 9.997000  |
| N  | 12.057000 | 11.104000 | 10.001000 |
| N  | 7.138000  | 11.107000 | 9.998000  |
| N  | 12.058000 | 8.649000  | 10.001000 |
| O  | 9.594000  | 7.099000  | 10.000000 |
| O  | 9.603000  | 12.657000 | 10.000000 |
| H  | 12.139000 | 12.133000 | 10.001000 |
| H  | 7.050000  | 12.136000 | 9.999000  |
| Co | 5.768000  | 9.878000  | 9.998000  |
| H  | 19.808001 | 7.617000  | 9.998000  |
| H  | 14.722000 | 7.616000  | 10.002000 |
| C  | 16.038000 | 9.155000  | 10.001000 |

|    |           |           |           |
|----|-----------|-----------|-----------|
| C  | 18.500000 | 10.600000 | 10.000000 |
| C  | 16.039000 | 10.597000 | 10.000000 |
| C  | 18.499001 | 9.158000  | 9.999000  |
| C  | 17.268999 | 8.369000  | 10.000000 |
| C  | 17.268999 | 11.387000 | 10.000000 |
| N  | 14.807000 | 8.645000  | 10.001000 |
| N  | 19.731001 | 11.110000 | 10.000000 |
| N  | 14.809000 | 11.109000 | 10.001000 |
| N  | 19.729000 | 8.647000  | 9.999000  |
| O  | 17.271000 | 7.107000  | 9.999000  |
| O  | 17.266001 | 12.648000 | 10.000000 |
| H  | 19.816000 | 12.139000 | 10.000000 |
| H  | 14.730000 | 12.138000 | 10.001000 |
| Co | 13.428000 | 9.877000  | 10.001000 |
| H  | 27.485001 | 7.620000  | 10.001000 |
| H  | 22.400000 | 7.623000  | 9.999000  |
| C  | 23.715000 | 9.158000  | 9.999000  |
| C  | 26.162001 | 10.598000 | 10.001000 |
| C  | 23.714001 | 10.602000 | 10.000000 |
| C  | 26.163000 | 9.155000  | 10.001000 |
| C  | 24.938000 | 8.365000  | 10.000000 |
| C  | 24.938999 | 11.392000 | 10.000000 |
| N  | 22.481001 | 8.652000  | 9.999000  |
| N  | 27.396999 | 11.104000 | 10.001000 |
| N  | 22.479000 | 11.107000 | 10.000000 |
| N  | 27.398001 | 8.649000  | 10.001000 |
| O  | 24.936001 | 7.100000  | 10.000000 |
| O  | 24.943001 | 12.657000 | 10.000000 |
| H  | 27.479000 | 12.133000 | 10.001000 |
| H  | 22.391001 | 12.136000 | 10.000000 |
| Co | 21.110001 | 9.878000  | 9.999000  |
| H  | 35.147999 | 7.618000  | 9.998000  |
| H  | 30.061001 | 7.616000  | 10.000000 |
| C  | 31.378000 | 9.156000  | 10.001000 |
| C  | 33.840000 | 10.600000 | 9.999000  |
| C  | 31.379000 | 10.597000 | 10.001000 |
| C  | 33.839001 | 9.159000  | 9.999000  |
| C  | 32.609001 | 8.369000  | 10.000000 |
| C  | 32.609001 | 11.387000 | 10.000000 |
| N  | 30.146999 | 8.646000  | 10.001000 |

|    |           |           |           |
|----|-----------|-----------|-----------|
| N  | 35.070999 | 11.110000 | 9.998000  |
| N  | 30.149000 | 11.109000 | 10.002000 |
| N  | 35.068001 | 8.647000  | 9.998000  |
| O  | 32.611000 | 7.107000  | 10.000000 |
| O  | 32.605999 | 12.649000 | 10.001000 |
| H  | 35.155998 | 12.139000 | 9.999000  |
| H  | 30.069000 | 12.138000 | 10.002000 |
| Co | 28.768000 | 9.877000  | 10.001000 |
| H  | 16.011000 | 14.309000 | 10.000000 |
| H  | 10.927000 | 14.306000 | 10.001000 |
| C  | 12.242000 | 15.846000 | 10.001000 |
| C  | 14.704000 | 17.292000 | 9.999000  |
| C  | 12.243000 | 17.288000 | 10.001000 |
| C  | 14.703000 | 15.850000 | 10.000000 |
| C  | 13.473000 | 15.060000 | 10.000000 |
| C  | 13.473000 | 18.077999 | 10.000000 |
| N  | 11.012000 | 15.336000 | 10.001000 |
| N  | 15.935000 | 17.801001 | 9.999000  |
| N  | 11.013000 | 17.799999 | 10.002000 |
| N  | 15.933000 | 15.338000 | 9.999000  |
| O  | 13.476000 | 13.798000 | 10.000000 |
| O  | 13.470000 | 19.340000 | 9.999000  |
| H  | 16.020000 | 18.830999 | 9.999000  |
| H  | 10.933000 | 18.829000 | 10.002000 |
| Co | 9.633000  | 16.566999 | 10.002000 |
| H  | 23.690001 | 14.311000 | 10.001000 |
| H  | 18.603001 | 14.314000 | 9.998000  |
| C  | 19.919001 | 15.850000 | 10.000000 |
| C  | 22.367001 | 17.289000 | 10.000000 |
| C  | 19.919001 | 17.292999 | 10.001000 |
| C  | 22.367001 | 15.846000 | 10.001000 |
| C  | 21.142000 | 15.056000 | 10.000000 |
| C  | 21.143999 | 18.083000 | 10.000000 |
| N  | 18.684999 | 15.343000 | 9.999000  |
| N  | 23.601999 | 17.795000 | 10.000000 |
| N  | 18.683001 | 17.798000 | 10.001000 |
| N  | 23.603001 | 15.340000 | 10.000000 |
| O  | 21.139000 | 13.791000 | 10.000000 |
| O  | 21.146999 | 19.348000 | 10.001000 |
| H  | 23.684000 | 18.823999 | 9.999000  |

|    |           |           |           |
|----|-----------|-----------|-----------|
| H  | 18.594999 | 18.827999 | 10.001000 |
| Co | 17.313999 | 16.569000 | 10.000000 |
| H  | 31.353001 | 14.309000 | 9.999000  |
| H  | 26.267000 | 14.307000 | 9.999000  |
| C  | 27.583000 | 15.847000 | 9.999000  |
| C  | 30.045000 | 17.292000 | 10.001000 |
| C  | 27.584000 | 17.289000 | 9.999000  |
| C  | 30.044001 | 15.850000 | 10.000000 |
| C  | 28.813999 | 15.060000 | 10.000000 |
| C  | 28.813999 | 18.079000 | 10.000000 |
| N  | 26.351999 | 15.337000 | 9.999000  |
| N  | 31.277000 | 17.801001 | 10.001000 |
| N  | 26.354000 | 17.799999 | 9.999000  |
| N  | 31.274000 | 15.338000 | 10.000000 |
| O  | 28.816999 | 13.799000 | 10.000000 |
| O  | 28.811001 | 19.340000 | 10.000000 |
| H  | 31.362000 | 18.830999 | 10.002000 |
| H  | 26.273001 | 18.829000 | 9.999000  |
| Co | 24.973000 | 16.568001 | 10.000000 |
| H  | 39.032001 | 14.310000 | 10.001000 |
| H  | 33.945000 | 14.314000 | 10.001000 |
| C  | 35.261002 | 15.849000 | 10.000000 |
| C  | 37.709000 | 17.289000 | 10.001000 |
| C  | 35.261002 | 17.292999 | 10.000000 |
| C  | 37.709000 | 15.845000 | 10.001000 |
| C  | 36.484001 | 15.055000 | 10.000000 |
| C  | 36.486000 | 18.083000 | 10.000000 |
| N  | 34.027000 | 15.343000 | 10.000000 |
| N  | 38.944000 | 17.795000 | 10.002000 |
| N  | 34.025002 | 17.798000 | 10.001000 |
| N  | 38.945000 | 15.340000 | 10.001000 |
| O  | 36.480999 | 13.790000 | 10.000000 |
| O  | 36.490002 | 19.348000 | 10.000000 |
| H  | 39.026001 | 18.823999 | 10.002000 |
| H  | 33.938000 | 18.827999 | 10.000000 |
| Co | 32.654999 | 16.569000 | 10.001000 |
| H  | 19.861000 | 20.940001 | 10.002000 |
| H  | 14.774000 | 20.944000 | 9.997000  |
| C  | 16.090000 | 22.479000 | 9.998000  |
| C  | 18.538000 | 23.919001 | 10.001000 |

|    |           |           |           |
|----|-----------|-----------|-----------|
| C  | 16.090000 | 23.923000 | 9.999000  |
| C  | 18.538000 | 22.476000 | 10.001000 |
| C  | 17.313000 | 21.686001 | 10.000000 |
| C  | 17.315001 | 24.712999 | 10.000000 |
| N  | 14.855000 | 21.973000 | 9.997000  |
| N  | 19.773001 | 24.424999 | 10.001000 |
| N  | 14.854000 | 24.427999 | 9.998000  |
| N  | 19.774000 | 21.969999 | 10.001000 |
| O  | 17.309999 | 20.420000 | 10.000000 |
| O  | 17.319000 | 25.978001 | 10.000000 |
| H  | 19.855000 | 25.454000 | 10.001000 |
| H  | 14.766000 | 25.457001 | 9.999000  |
| Co | 13.484000 | 23.198999 | 9.998000  |
| H  | 27.524000 | 20.938000 | 9.998000  |
| H  | 22.438000 | 20.937000 | 10.002000 |
| C  | 23.754000 | 22.476000 | 10.001000 |
| C  | 26.216000 | 23.921000 | 10.000000 |
| C  | 23.754999 | 23.917999 | 10.000000 |
| C  | 26.215000 | 22.479000 | 9.999000  |
| C  | 24.985001 | 21.690001 | 10.000000 |
| C  | 24.985001 | 24.708000 | 10.000000 |
| N  | 22.523001 | 21.966000 | 10.001000 |
| N  | 27.447001 | 24.431000 | 10.000000 |
| N  | 22.525000 | 24.430000 | 10.001000 |
| N  | 27.445000 | 21.968000 | 9.999000  |
| O  | 24.987000 | 20.427999 | 9.999000  |
| O  | 24.982000 | 25.969000 | 10.000000 |
| H  | 27.532000 | 25.459999 | 10.000000 |
| H  | 22.445999 | 25.459000 | 10.001000 |
| Co | 21.143999 | 23.198000 | 10.001000 |
| H  | 35.201000 | 20.941000 | 10.001000 |
| H  | 30.115999 | 20.944000 | 9.999000  |
| C  | 31.431000 | 22.479000 | 9.999000  |
| C  | 33.877998 | 23.919001 | 10.001000 |
| C  | 31.430000 | 23.923000 | 10.000000 |
| C  | 33.879002 | 22.476000 | 10.001000 |
| C  | 32.653999 | 21.686001 | 10.000000 |
| C  | 32.654999 | 24.712999 | 10.000000 |
| N  | 30.197001 | 21.973000 | 9.999000  |
| N  | 35.112999 | 24.424999 | 10.001000 |

|    |           |           |           |
|----|-----------|-----------|-----------|
| N  | 30.195000 | 24.427999 | 10.000000 |
| N  | 35.113998 | 21.969999 | 10.001000 |
| O  | 32.652000 | 20.421000 | 10.000000 |
| O  | 32.659000 | 25.978001 | 10.000000 |
| H  | 35.195000 | 25.454000 | 10.001000 |
| H  | 30.107000 | 25.457001 | 10.000000 |
| Co | 28.826000 | 23.198999 | 9.999000  |
| H  | 42.863998 | 20.938999 | 9.998000  |
| H  | 37.777000 | 20.937000 | 10.000000 |
| C  | 39.094002 | 22.476999 | 10.001000 |
| C  | 41.556000 | 23.921000 | 9.999000  |
| C  | 39.095001 | 23.917999 | 10.001000 |
| C  | 41.555000 | 22.480000 | 9.999000  |
| C  | 40.325001 | 21.690001 | 10.000000 |
| C  | 40.325001 | 24.708000 | 10.000000 |
| N  | 37.862999 | 21.966999 | 10.001000 |
| N  | 42.786999 | 24.431000 | 9.998000  |
| N  | 37.865002 | 24.430000 | 10.002000 |
| N  | 42.784000 | 21.968000 | 9.998000  |
| O  | 40.327000 | 20.427999 | 10.000000 |
| O  | 40.321999 | 25.969999 | 10.001000 |
| H  | 42.872002 | 25.459999 | 9.999000  |
| H  | 37.785000 | 25.459000 | 10.002000 |
| Co | 36.484001 | 23.198000 | 10.001000 |
